# Supplementary material for: Rev-erbα in the brain is essential for circadian food entrainment
Source: PubMed Central journal article supplement (PMC4933951; doi:10.1038/srep29386), 2016-07-06
Supplement: srep29386-s1.pdf [file srep29386-s1.pdf]

## ***Rev-erba* in the brain is essential for circadian food entrainment**

Julien Delezie, Stéphanie Dumont, Cristina Sandu, Sophie Reibel, Paul Pevet, & Etienne Challet<sup>1\*</sup>

### **Supplemental Information**

Figure S1: Synchronization of the liver clock by mealtime in *Rev-erba* GKO mice

Figure S2: Conditional knock-out strategy

Figure S3: Breeding scheme of *Rev-erba* GKO mice

Supplemental Tables

**Figure S1:** Synchronization of the liver clock by mealtime in *Rev-erba* BKO mice

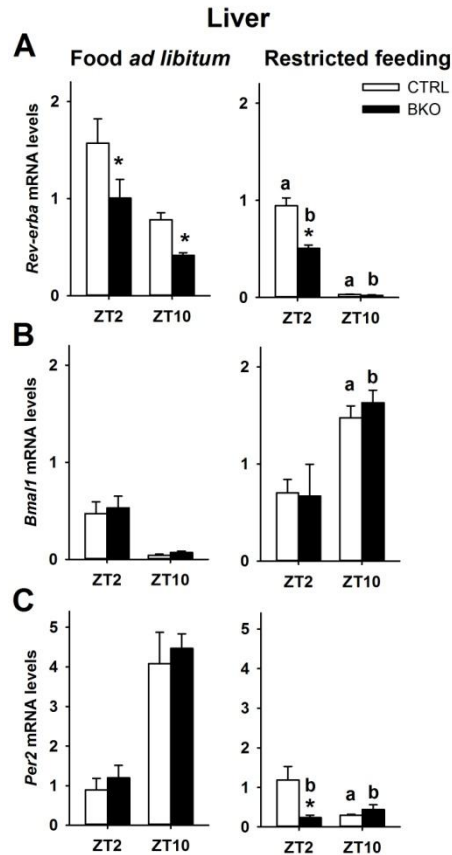

Expression of *Rev-erba* (A), *Bmal1* (B), *Per2* (C) under conditions of food *ad libitum* (left panel) and restricted feeding (right panel). \*  $p < 0.05$  for BKO vs. WT animals at a given time-point as determined by 2-way ANOVA and Tukey HSD *post-hoc* test; <sup>a</sup>  $p < 0.05$  for restricted feeding vs. food *ad libitum* at a given time-point in wild-type (WT) mice (2-way ANOVA and Tukey *post-hoc* test); <sup>b</sup>  $p < 0.05$  for restricted feeding vs. food *ad libitum* at a given time-point in *Rev-erba* brain-specific knock-out (BKO) mice (2-way ANOVA and Tukey *post-hoc* test). ZT: Zeitgeber Time.

**Figure S2:** Conditional knock-out strategy

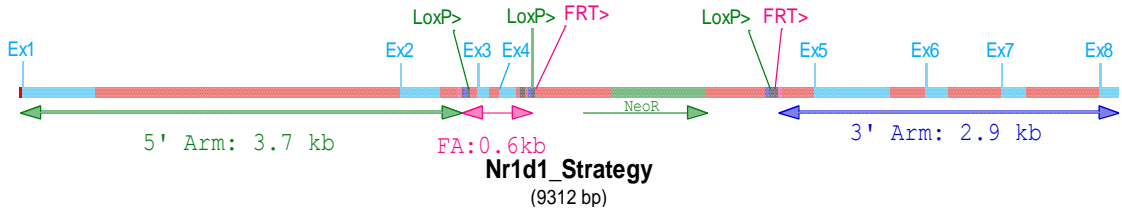

Strategy chosen: flox of exons 3 and 4.

*Nr1d1* gene (also named *RevErb $\alpha$* ) is a member of the nuclear receptor family. Additional information on this gene can be accessed at:

<http://www.informatics.jax.org/javawi2/servlet/WIFetch?page=markerDetail&key=85194>

LoxP and FRT sites are indicated in green and pink, respectively. *Mus musculus* sequences are indicated in uppercase. Exogenous sequences are marked in lowercase. The targeting vector was generated in 129Sv/Pas (Mouse Clinical Institute, Strasbourg, France and European EUMODIC consortium).

**Figure S3:** Breeding scheme of *Rev-erba* BKO mice

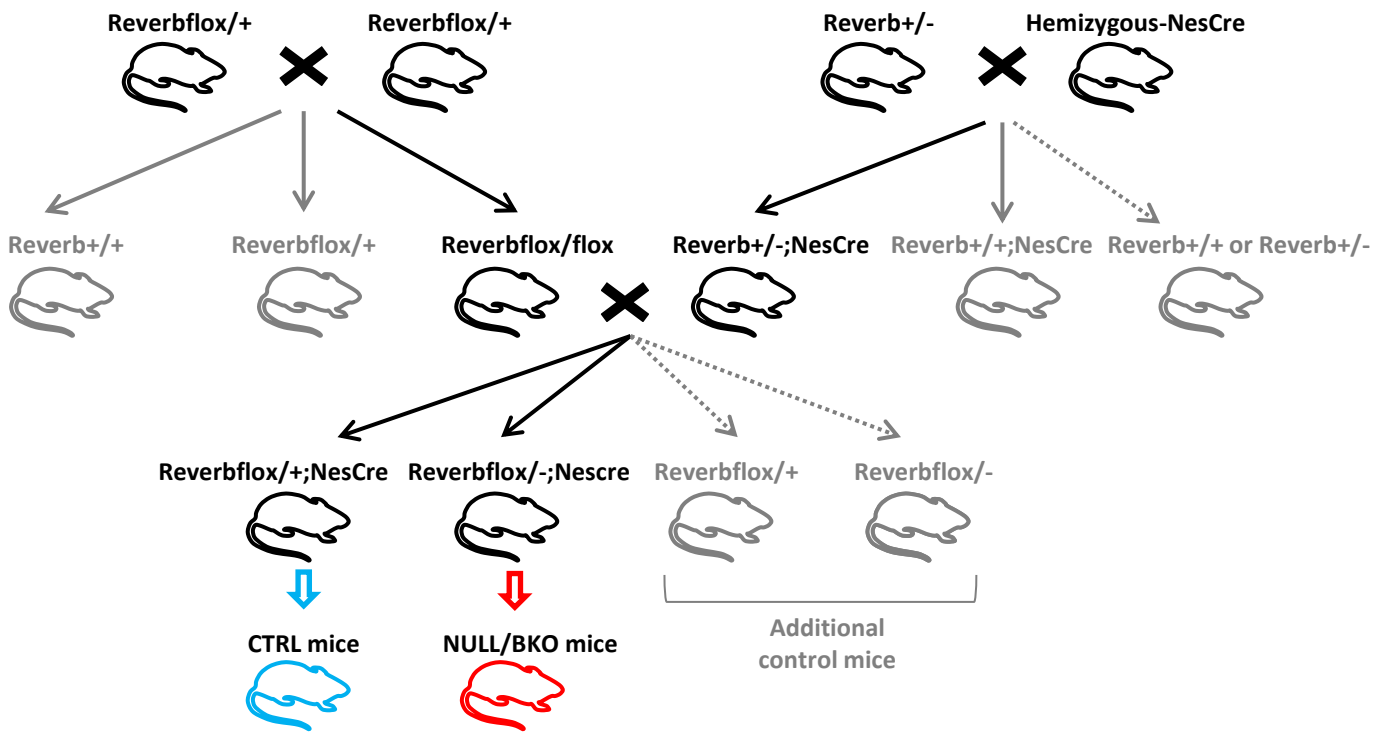

## Supplemental tables

**Table S1:** Cosinor analysis of PER2 expression in the hypothalamus and cerebellum of WT and *Rev-erba* GKO mice.

**Table S2:** Cosinor analysis of P-ERK expression in the hypothalamus and cerebellum of WT and *Rev-erba* GKO mice.

**Supplemental Table S1.** Cosinor analysis of PER2 expression in the hypothalamus and cerebellum of WT and *Rev-erba* GKO mice.

|     |   | Food <i>ad libitum</i> |     |        |                      |     |                  | Restricted feeding   |     |                  |                     |     |                  |
|-----|---|------------------------|-----|--------|----------------------|-----|------------------|----------------------|-----|------------------|---------------------|-----|------------------|
|     |   | WT                     |     |        | GKO                  |     |                  | WT                   |     |                  | GKO                 |     |                  |
|     |   | Mean                   | SEM | P      | Mean                 | SEM | P                | Mean                 | SEM | P                | Mean                | SEM | P                |
| VMH | a | 47.4                   | 3.7 | <0.001 | <i>44.6</i>          | 2.5 | <i>&lt;0.001</i> | 51.5                 | 3.3 | <0.001           | 53.8                | 3.3 | <i>&lt;0.001</i> |
|     | b | 18.0                   | 5.2 | 0.003  | 5.6                  | 3.5 | <i>NS</i>        | 13.6                 | 4.7 | 0.01             | 6.9                 | 4.5 | <i>NS</i>        |
|     | c | ZT18.6 <sup>a</sup>    | 1.1 | <0.001 |                      |     |                  | ZT11.0 <sup>b</sup>  | 1.3 | <0.001           |                     |     |                  |
| ARC | a | 52.0                   | 2.5 | <0.001 | 53.2                 | 2.4 | <0.001           | 57.6                 | 3.1 | <0.001           | 53.9                | 3.7 | <0.001           |
|     | b | 15.7                   | 3.6 | <0.001 | 7.6                  | 3.3 | 0.04             | 9.4                  | 4.4 | 0.05             | 11.8                | 5.1 | 0.04             |
|     | c | ZT18.1 <sup>a</sup>    | 0.8 | <0.001 | ZT13.2 <sup>ab</sup> | 1.8 | <0.001           | ZT9.8 <sup>b</sup>   | 1.8 | <0.001           | ZT10.0 <sup>b</sup> | 1.8 | <0.001           |
| PVN | a | 39.0                   | 2.8 | <0.001 | 38.8                 | 1.6 | <0.001           | 45.1                 | 2.3 | <0.001           | 43.8                | 2.4 | <0.001           |
|     | b | 10.9                   | 4.0 | 0.01   | 4.9                  | 2.3 | 0.05             | 10.1                 | 3.2 | 0.007            | 9.7                 | 3.5 | 0.02             |
|     | c | ZT17.8 <sup>a</sup>    | 1.4 | <0.001 | ZT15.3 <sup>ab</sup> | 1.8 | <0.001           | ZT10.6 <sup>bc</sup> | 1.2 | <0.001           | ZT7.7 <sup>c</sup>  | 1.3 | <0.001           |
| SCN | a | 77.9                   | 4.3 | <0.001 | 79.9                 | 3.3 | <0.001           | 84.1                 | 4.8 | <0.001           | 81.8                | 3.5 | <0.001           |
|     | b | 22.8                   | 6.1 | 0.001  | 11.4                 | 4.6 | 0.03             | 22.1                 | 6.8 | 0.001            | 16.7                | 4.8 | 0.004            |
|     | c | ZT14.7 <sup>a</sup>    | 1.0 | <0.001 | ZT13.6 <sup>a</sup>  | 1.6 | <0.001           | ZT10.9 <sup>a</sup>  | 1.2 | <0.001           | ZT10.1 <sup>a</sup> | 1.2 | <0.001           |
| CRB | a | 21.7                   | 0.7 | <0.001 | 22.0                 | 1.5 | <i>&lt;0.001</i> | 25.1                 | 1.5 | <i>&lt;0.001</i> | 22.4                | 1.1 | <0.001           |
|     | b | 3.2                    | 0.9 | 0.003  | 2.9                  | 2.0 | <i>NS</i>        | 3.1                  | 2.2 | <i>NS</i>        | 4.3                 | 1.7 | 0.02             |
|     | c | ZT19.4 <sup>a</sup>    | 1.1 | <0.001 |                      |     |                  |                      |     |                  | ZT18.9 <sup>a</sup> | 1.3 | <0.001           |

The table S1 shows the three parameters of cosinor regression, including a the mean level, b the amplitude, and c the acrophase of the rhythm (see Methods). For the acrophase, the reference time is Zeitgeber (ZT) 0 (i.e., lights on). NS, non-significant amplitude, making the whole regression not statistically significant (shown by italicized characters; See Methods). For a given structure, the acrophases (c) were compared respectively with t-tests or ANOVA when there were 2 or more groups with significant regressions (c values are not shown when the amplitude was not significant). For a given structure, means lacking common letters are significantly different ( $p < 0.05$ ). WT, wild-type; GKO, global knock-out.

**Supplemental Table S2.** Cosinor analysis of P-ERK expression in the hypothalamus and cerebellum of WT and *Rev-erba* GKO mice.

|     |   | Food <i>ad libitum</i> |     |          |                     |     |          | Restricted feeding |     |          |       |     |          |
|-----|---|------------------------|-----|----------|---------------------|-----|----------|--------------------|-----|----------|-------|-----|----------|
|     |   | WT                     |     |          | GKO                 |     |          | WT                 |     |          | GKO   |     |          |
|     |   | Mean                   | SEM | <i>p</i> | Mean                | SEM | <i>p</i> | Mean               | SEM | <i>p</i> | Mean  | SEM | <i>p</i> |
| VMH | a | 146.4                  | 5.3 | <0.001   | 144.6               | 5.2 | <0.001   | 147.5              | 4.8 | <0.001   | 144.6 | 5.3 | <0.001   |
|     | b | 4.0                    | 7.5 | NS       | 14.3                | 7.2 | NS       | 10.2               | 6.9 | NS       | 13.4  | 7.5 | NS       |
|     | c |                        |     |          |                     |     |          |                    |     |          |       |     |          |
| ARC | a | 166.4                  | 3.8 | <0.001   | 164.1               | 4.5 | <0.001   | 170.9              | 2.3 | <0.001   | 167.5 | 3.4 | <0.001   |
|     | b | 13.8                   | 5.4 | 0.02     | 13.9                | 6.3 | 0.04     | 8.5                | 2.8 | 0.01     | 7.3   | 4.8 | NS       |
|     | c | ZT13.5 <sup>a</sup>    | 1.5 | <0.001   | ZT7.2 <sup>b</sup>  | 1.7 | <0.001   | ZT5.2 <sup>b</sup> | 1.7 | <0.001   |       |     |          |
| PVN | a | 162.4                  | 3.1 | <0.001   | 165.7               | 3.0 | <0.001   | 161.2              | 1.9 | <0.001   | 155.9 | 4.9 | <0.001   |
|     | b | 6.4                    | 4.3 | NS       | 2.1                 | 4.2 | NS       | 5.4                | 2.4 | 0.04     | 14.5  | 6.9 | NS       |
|     | c |                        |     |          |                     |     |          | ZT6.1              | 2.1 | <0.001   |       |     |          |
| DMH | a | 143.2                  | 6.0 | <0.001   | 146.3               | 4.8 | <0.001   | 138.4              | 6.8 | <0.001   | 135.9 | 6.4 | <0.001   |
|     | b | 12.4                   | 8.7 | NS       | 11.3                | 6.7 | NS       | 12.6               | 9.0 | NS       | 18.0  | 9.0 | NS       |
|     | c |                        |     |          |                     |     |          |                    |     |          |       |     |          |
| SCN | a | 160.8                  | 4.7 | <0.001   | 155.4               | 2.3 | <0.001   | 152.1              | 3.3 | <0.001   | 146.3 | 4.0 | <0.001   |
|     | b | 6.8                    | 6.4 | NS       | 5.5                 | 3.2 | NS       | 18.6               | 4.3 | <0.001   | 9.2   | 5.6 | NS       |
|     | c |                        |     |          |                     |     |          | ZT7.8              | 1.1 | <0.001   |       |     |          |
| CRB | a | 50.6                   | 2.9 | <0.001   | 54.1                | 4.0 | <0.001   | 57.5               | 3.5 | <0.001   | 61.5  | 4.1 | <0.001   |
|     | b | 22.0                   | 4.0 | <0.001   | 14.9                | 5.6 | 0.02     | 6.2                | 5.0 | NS       | 8.0   | 6.6 | NS       |
|     | c | ZT23.3 <sup>a</sup>    | 0.7 | <0.001   | ZT21.5 <sup>b</sup> | 1.4 | <0.001   |                    |     |          |       |     |          |

The table S2 shows the three parameters of cosinor regression, including a the mean level, b the amplitude, and c the acrophase of the rhythm (see Methods). For the acrophase, the reference time is Zeitgeber (ZT) 0 (i.e., lights on). NS, non-significant amplitude, making the whole regression not statistically significant (shown by italicized characters; See Methods). For a given structure, the acrophases (c) were compared respectively with t-tests or ANOVA when there were 2 or more groups with significant regressions (c values are not shown when the amplitude was not significant). For a given structure, means lacking common letters are significantly different ( $p < 0.05$ ). WT, wild-type; GKO, global knock-out.
